# Supplementary material for: BAP31 Plays an Essential Role in Mouse B Cell Development via Regulation of BCR Signaling
Source: MDPI journal article supplement (doi:10.3390/ijms25094962), 2024-05-02
Supplement: s1 [file s1]

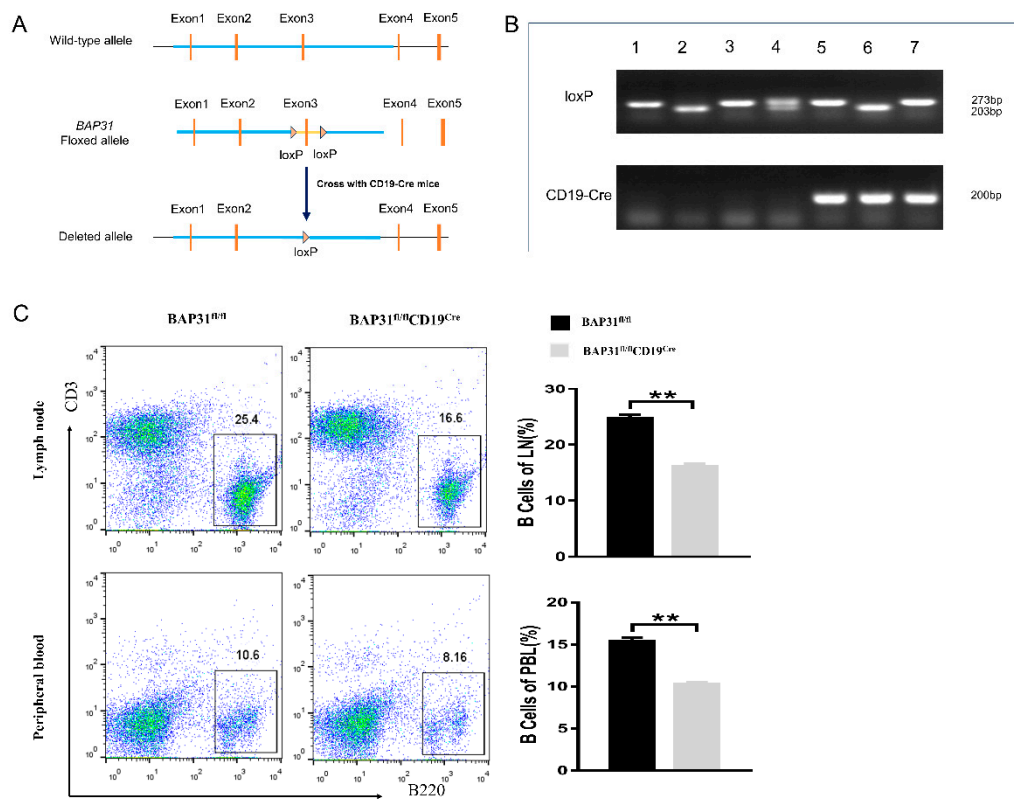

Supplemental Figure S1. (A) Construction strategy of *BAP31* conditional knockout mice. Diagram indicating the locations of *BAP31* exons, loxP sites and deletion of exon 3 by Cre recombinase. (B) RT-PCR analysis Cre-recombination and mouse genotypes (n=7). Of the seven littermates detected, Lanes 5 and 7 with two bands of 273 bp and 200 bp were identified as *BAP31<sup>fl/fl</sup>CD19<sup>Cre</sup>*, Lanes 1 and 3 with one band of 273 bp were identified as *BAP31<sup>fl/fl</sup>* mice. (C) Representative flow cytometry profiles of lymph node (LN) and peripheral blood (PBL) from *BAP31<sup>fl/fl</sup>* mice and *BAP31<sup>fl/fl</sup>CD19<sup>Cre</sup>* mice to identify B cell populations (n=3). Numbers in the plots indicate percentages in each gate.

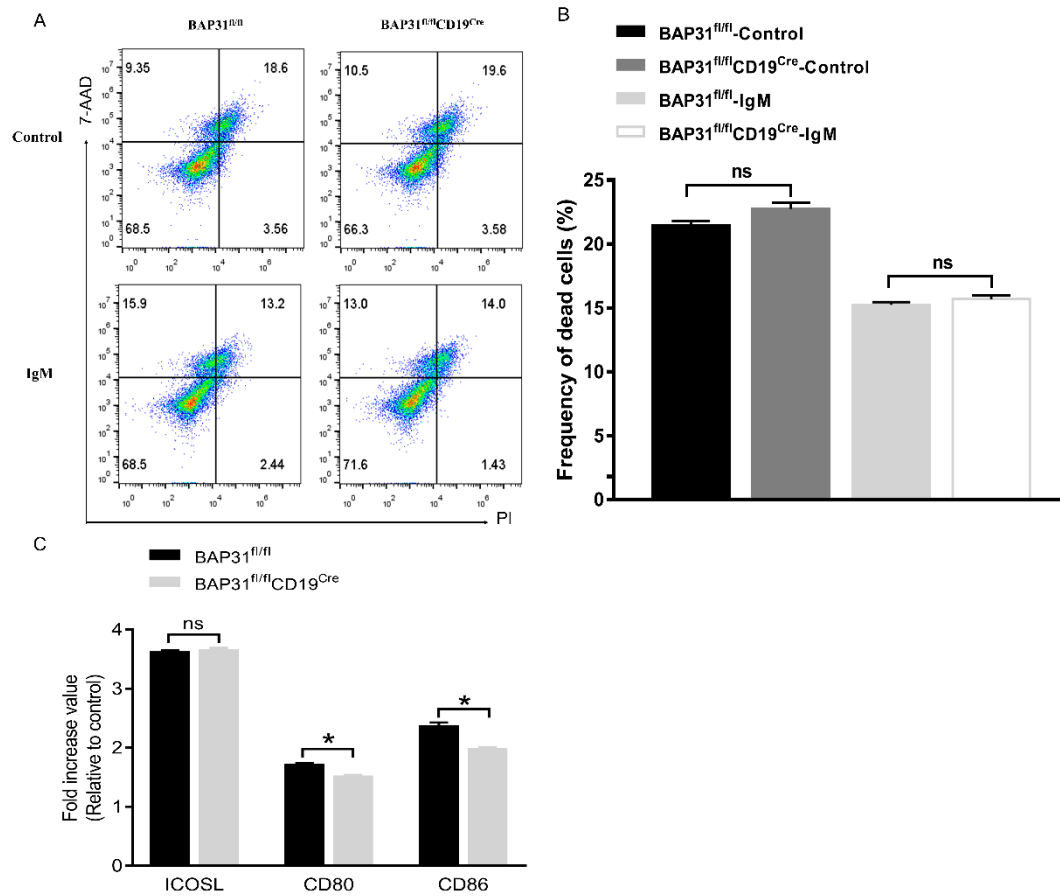

**Supplemental Figure S2.** (A) Flow cytometry detect the apoptosis of B cells stimulated with IgM using annexin V-FITC/PI staining (n=3). (B) Statistic histogram images of died cells. ns, no significant difference.(C) )Fold increase value of ICOSL , CD80, and CD86 compared to corresponding controls (n=3).
